# Supplementary material for: PAR-intercalated Mg/Al layered double hydroxide for efficient adsorption of acid fuchsin: experimental study and molecular docking insights
Source: Royal Society of Chemistry journal article supplement (doi:10.1039/d5ra08890a), 2026-01-01
Supplement: d5ra08890a1.pdf [file d5ra08890a1.pdf]

## PAR-intercalated Mg/Al layered double hydroxide for efficient adsorption of Acid Fuchsin: experimental study and molecular docking insights

Sara E Abdel Hameed<sup>1</sup>, Weam M. Abou El-Maaty<sup>1</sup>, Esam A. Gomaa<sup>1</sup>, Fathi S. Awad<sup>1,\*</sup>

Chemistry Department Faculty of Science, Mansoura University, Mansoura, Egypt

### Supporting Information

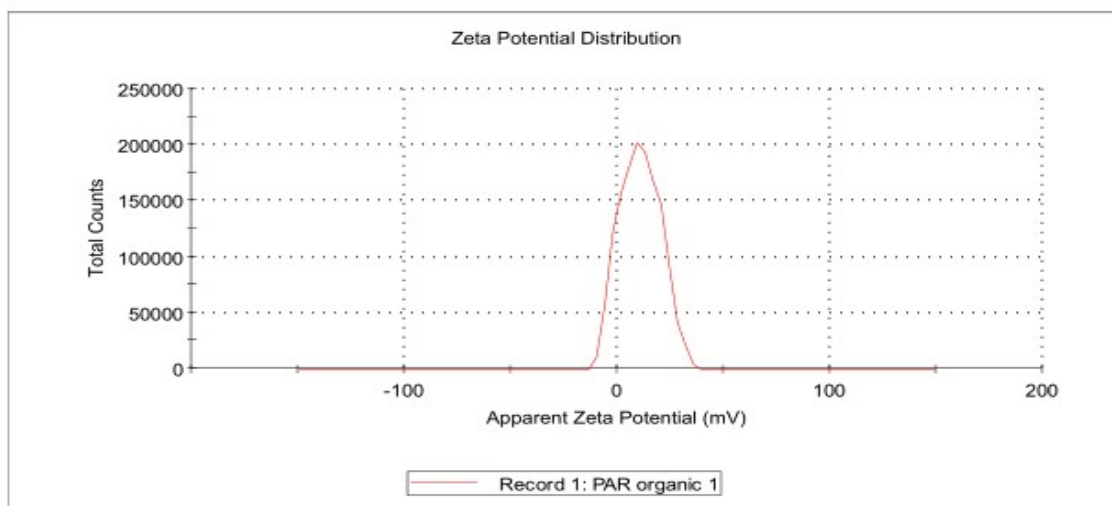

**Fig.S1.** Zeta Potential of PAR-Mg/Al LDH

**Table S1:** Remediation of various anionic dyes using MgAl LDHS and/or organic compounds prepared through different reported methods.

| Adsorbent                                                | Target dye         | Q <sub>e</sub> (mg/g) | Ref |
|----------------------------------------------------------|--------------------|-----------------------|-----|
| LDH modified with anionic surfactant (SDS-templated)     | Methyl Orange (MO) | 416.7                 | 1   |
| Mg–Al LDH (hydrothermal) — baseline study on anionic dye | Methyl Orange      | 148.3                 | 2   |
| MgAl-LDH                                                 | Methylene orange   | 197.62                | 3   |
| MgAl-Charcoal activated                                  | direct yellow      | 133.33                | 4   |

|                |                                |        |              |
|----------------|--------------------------------|--------|--------------|
| Pure Mg/Al-LDH | Reactive Brilliant Orange X-GN | ≈79–83 | 5            |
| CoAl-LDH       | Acid fuchsin                   | 384.62 | 6            |
| PAR-Mg/Al LDH  | Acid fuchsin                   | 568.18 | Present work |

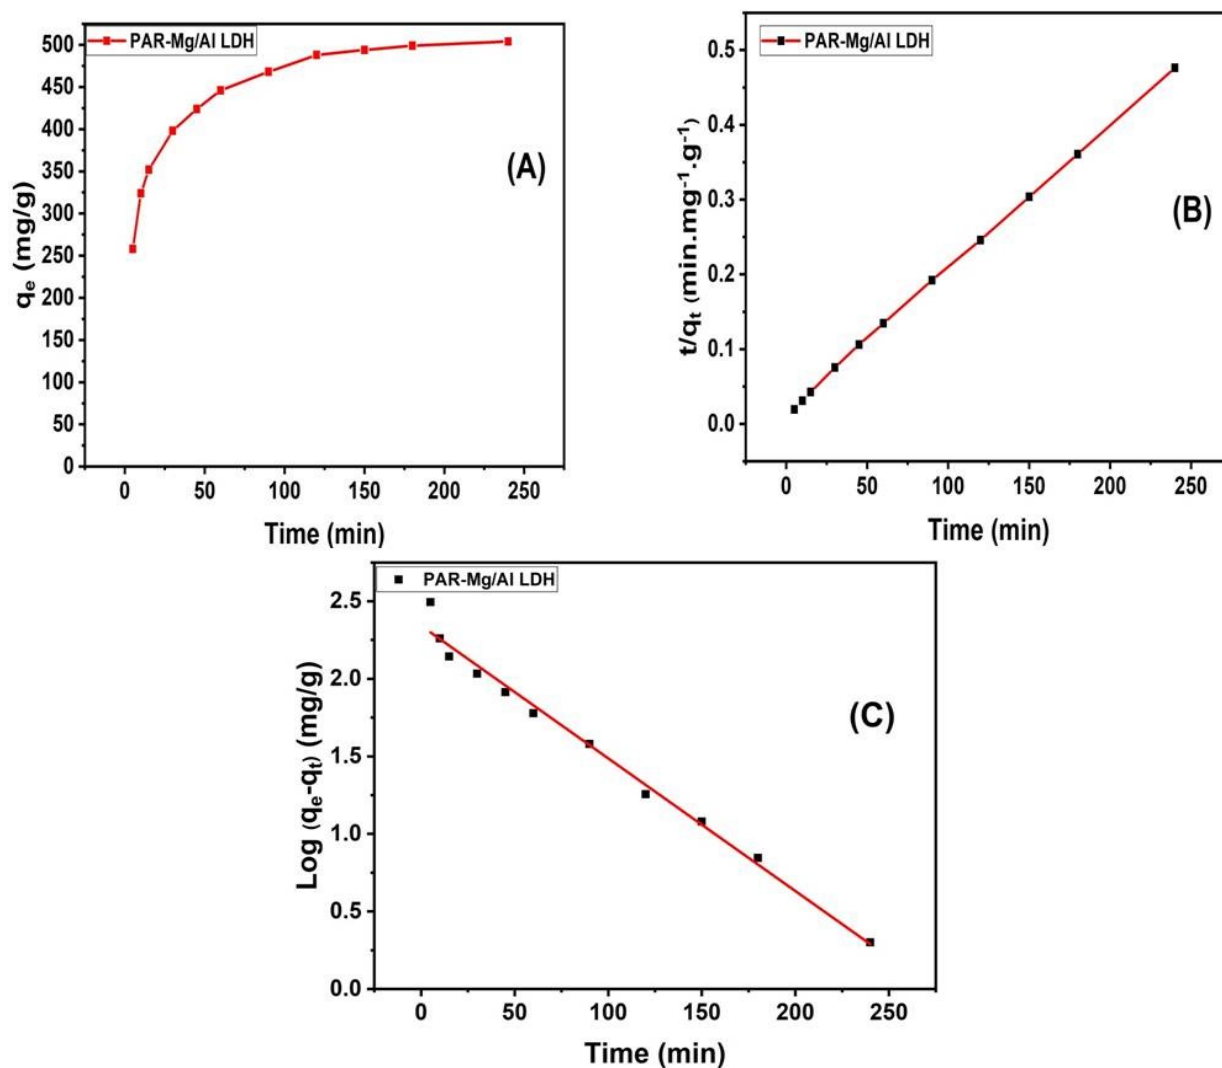

**Fig.S2.** (A) The adsorption capacity of PAR-Mg/Al LDH as a function of contact time; (B) PSO kinetic model; (C) PFO kinetic model.

### S1. Intraparticle Diffusion Model (Weber–Morris Model)

The Weber–Morris intraparticle diffusion model was applied to examine whether the adsorption process was controlled by film diffusion, intraparticle diffusion, or a combination of multiple steps, according to Eq. (1) <sup>7</sup>.

$$q_t = K_{id} t^{1/2} + C \quad (1)$$

In this model,  $k_{id}$  ( $\text{mg g}^{-1} \text{h}^{-0.5}$ ) represents the intraparticle diffusion rate constant, and  $C$  is a constant related to the thickness of the boundary layer. If intraparticle diffusion is involved in the adsorption process, a plot of  $q_t$  versus  $t^{1/2}$  should yield a linear relationship. Furthermore, if intraparticle diffusion is the sole rate-limiting step, the plot should pass through the origin. The intercept  $C$  provides insight into the contribution of external mass transfer resistance, where higher  $C$  values indicate a greater boundary layer effect.

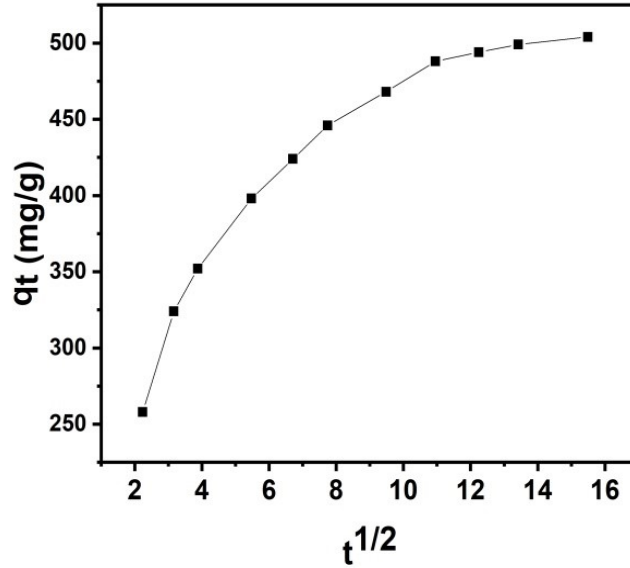

Fig. S3. Intraparticle diffusion plots for the adsorption of Acid Fuchsin on PAR-Mg/Al LDH.

## S2. Boyd Kinetic Model:

To further distinguish between film diffusion and intraparticle diffusion as the rate-limiting step, the Boyd kinetic model was employed and is expressed by Eq. (2) <sup>8</sup>.

$$F = 1 - \frac{6}{\pi^2} \exp(-Bt) \quad (2)$$

In this model,  $F$  represents the fractional attainment of equilibrium at time  $t$ , and  $B_t$  is a function of  $F$ .

$$F = q_t/q_e \quad (3)$$

Where  $q_t$  and  $q_e$  are the dye uptake ( $\text{mmol g}^{-1}$ ) at time  $t$  and at equilibrium, respectively. Eq. (2) can be rearranged to Eq. (4).<sup>9</sup>

$$B_t = -0.4977 - \ln(1-F) \quad (4)$$

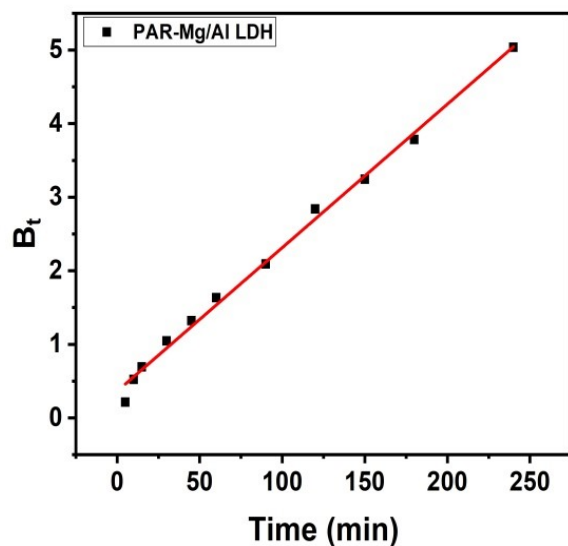

Fig. S4. Boyd plot ( $B_t$  versus  $t$ ) for the adsorption of Acid Fuchsin on PAR-Mg/Al LDH.

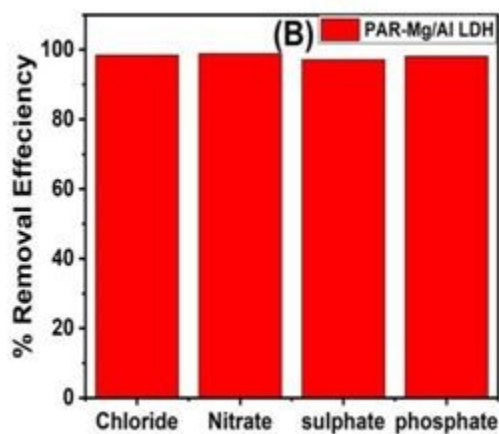

Fig.S5.Effect of interfering anions on acid fuchsin dye adsorption onto PAR-Mg/Al LDH.

**Table S2.** The docking interaction parameters of acid fuchsin with 7JWY: VIRAL PROTEIN / 7JWYCOVID -19.

| Ligand     |     |      | Receptor       | Interaction | Distance | E<br>(Kcal/mol) |
|------------|-----|------|----------------|-------------|----------|-----------------|
| Shape<br>A | N13 | 16 O | ASP 364<br>(A) | H-donor     | 3.22     | -2.1            |

|            |              |                |               |                |                 |                 |                 |   |
|------------|--------------|----------------|---------------|----------------|-----------------|-----------------|-----------------|---|
|            | O12 15 N     | PHE 338<br>(A) | H-acceptor    | 3.38           | -1.2            |                 |                 |   |
| Shape<br>B | N13 16<br>O  | CYC 336<br>(A) | H-donor       | 3.13           | -0.7            |                 |                 |   |
|            | O12 15<br>N  | PHE 338<br>(A) | H-acceptor    | 3.05           | -0.7            |                 |                 |   |
|            | O12 15<br>N  | GLY 339<br>(A) | H-acceptor    | 3.03           | -4.4            |                 |                 |   |
|            | 6-ring<br>CB | PHE 338<br>(A) | pi-H          | 4.04           | -0.6            |                 |                 |   |
|            | <b>S</b>     | <b>rmsd</b>    | <b>E_conf</b> | <b>E_place</b> | <b>E_score1</b> | <b>E_refine</b> | <b>E_score2</b> |   |
| 1          | -            | 1.2215178      | -             | -              | -               | -               | -               | - |
|            | 5.83096695   |                | 145.591721    | 89.7915039     | 8.36091042      | 29.4026527      | 5.83096695      |   |
| 2          | -            | 1.69807434     | -             | -              | -               | -               | -               | - |
|            | 5.69000053   |                | 143.553314    | 78.6248703     | 8.49876308      | 28.8788357      | 5.69000053      |   |

## References

1. X. Zhang, M. Xiang, Z. Zhu, Y. Zou and P. Zhang, *Clay Minerals*, 2021, **56**, 169-177.
2. L. Ai, C. Zhang and L. Meng, *Journal of Chemical & Engineering Data*, 2011, **56**, 4217-4225.
3. A. Zaghoul, R. Benhiti, A. Ait Ichou, G. Carja, A. Soudani, M. Zerbet, F. Sinan and M. Chiban, *Materials Today: Proceedings*, 2021, **37**, 3793-3797.
4. N. Ahmad, F. S. Arsyad, I. Royani and A. Lesbani, *Results in Chemistry*, 2023, **5**, 100766.
5. P. Wu, Q. Zhang, Y. Dai, N. Zhu, P. Li, J. Wu and Z. Dang, *Clays and Clay Minerals*, 2011, **59**, 438-445.
6. Z. Meguellati, N. Ghemmit-Doulache and R. Brahimi, *Inorganic Chemistry Communications*, 2023, **157**, 111226.
7. W. J. Weber Jr and J. C. Morris, *Journal of the sanitary engineering division*, 1963, **89**, 31-59.
8. G. Boyd, A. Adamson and L. Myers Jr, *Journal of the American Chemical Society*, 1947, **69**, 2836-2848.
9. D. Reichenberg, *Journal of the American Chemical Society*, 1953, **75**, 589-597.
